# Supplementary material
Source: PubMed Central journal article supplement (PMC9516440)
Supplement: NIHMS1833771-supplement-1.pdf [file NIHMS1833771-supplement-1.pdf]

**Supplementary Table 1.** Criteria Defining Resectability Status

| Resectability status  | Arterial                                                                                                                                                                                                                                                                                                                                                                                                                                                                                                                                                                                                                                                                                                                                                                                                                                                                                                                                                                                               | Venous                                                                                                                                                                                                                                                                                                                                                                                                 |
|-----------------------|--------------------------------------------------------------------------------------------------------------------------------------------------------------------------------------------------------------------------------------------------------------------------------------------------------------------------------------------------------------------------------------------------------------------------------------------------------------------------------------------------------------------------------------------------------------------------------------------------------------------------------------------------------------------------------------------------------------------------------------------------------------------------------------------------------------------------------------------------------------------------------------------------------------------------------------------------------------------------------------------------------|--------------------------------------------------------------------------------------------------------------------------------------------------------------------------------------------------------------------------------------------------------------------------------------------------------------------------------------------------------------------------------------------------------|
| Resectable            | No arterial tumor contact (celiac axis [CA], superior mesenteric artery [SMA], or common hepatic artery [CHA]).                                                                                                                                                                                                                                                                                                                                                                                                                                                                                                                                                                                                                                                                                                                                                                                                                                                                                        | No tumor contact with the superior mesenteric vein (SMV) or portal vein (PV) or $\leq 180^\circ$ contact without vein contour irregularity.                                                                                                                                                                                                                                                            |
| Borderline resectable | <p>Pancreatic head/uncinate process:</p> <ul style="list-style-type: none"> <li>• Tumor contact with CHA without extension to CA or hepatic artery bifurcation allowing for safe resection and reconstruction.</li> <li>• Tumor contact with the SMA of <math>\leq 180^\circ</math>.</li> <li>• Tumor contact with variant arterial anatomy (eg, accessory right hepatic artery, replaced right hepatic artery, replaced CHA, and the origin of replaced or accessory artery); presence and degree of tumor contact should be noted, as it may affect surgical planning.</li> </ul> <p>Pancreatic body/tail:</p> <ul style="list-style-type: none"> <li>• Tumor contact with the CA of <math>\leq 180^\circ</math>.</li> <li>• Tumor contact with the CA of <math>&gt;180^\circ</math> without involvement of the aorta and with uninvolved gastroduodenal artery, thereby permitting a modified Appleby procedure (some members prefer these criteria to be in the unresectable category).</li> </ul> | <ul style="list-style-type: none"> <li>• Tumor contact with the SMV or PV of <math>&gt;180^\circ</math>, contact of <math>\leq 180^\circ</math> with contour irregularity of the vein or thrombosis of the vein but with suitable proximal and distal vessel target allowing for safe and complete resection and vein reconstruction.</li> <li>• Tumor contact with the inferior vena cava.</li> </ul> |
| Locally advanced      | <p>Head/uncinate process:</p> <ul style="list-style-type: none"> <li>• Tumor contact with SMA <math>&gt;180^\circ</math>.</li> <li>• Tumor contact with the CA <math>&gt;180^\circ</math>.</li> </ul> <p>Pancreatic body/tail:</p> <ul style="list-style-type: none"> <li>• Tumor contact of <math>&gt;180^\circ</math> with the SMA or CA.</li> <li>• Tumor contact with the CA and aortic involvement.</li> </ul>                                                                                                                                                                                                                                                                                                                                                                                                                                                                                                                                                                                    | <ul style="list-style-type: none"> <li>• Unreconstructible SMV/PV because of tumor involvement or occlusion (can be due to tumor or bland thrombus).</li> </ul>                                                                                                                                                                                                                                        |

Adapted with permission from the NCCN Clinical Practice Guidelines in Oncology (NCCN Guidelines).<sup>139</sup>
